# Supplementary material for: Comparison between Some Phenotypic and Genotypic Methods for Assessment of Antimicrobial Resistance Trend of Bovine Mastitis Staphylococcus aureus Isolates from Bulgaria
Source: MDPI journal article supplement (doi:10.3390/vetsci9080401), 2022-07-31
Supplement: s1 [file s1]

**Table S1.** Nuc PCR temperature conditions

| Steps                | Temperature | Exposition |
|----------------------|-------------|------------|
| Initial denaturation | 95°C        | 5 min      |
| Denaturation         | 95°C        | 30 sec     |
| Annealing            | 55°C        | 30 sec     |
| Elongation           | 72°C        | 30 sec     |
| Final elongation     | 72°C        | 7 min      |
| Cycles               | 30          | -          |

**Table S2.** Classes of antimicrobial drugs included in the mastitis pathogens testing plate (Trek Diagnostic Systems Ltd, East Grinstead, UK), their concentrations and susceptible MIC breakpoints according to CLSI [27].

| Antimicrobials                               | Concentrations in the plate<br>µg/mL | Susceptible MIC breakpoint<br>µg/mL |
|----------------------------------------------|--------------------------------------|-------------------------------------|
| <b>Beta-lactams/penicillins</b>              |                                      |                                     |
| Penicillin                                   | 0.12 - 8                             | ≤ 0.12                              |
| Ampicillin                                   | 0.12 - 8                             | ≤ 0.25                              |
| Oxacillin                                    | 2 - 4                                | ≤ 2                                 |
| <b>Beta-lactams/other class combinations</b> |                                      |                                     |
| Penicillin/novobiocin                        | 1/2 – 8/16                           | ≤ 1/2                               |
| <b>Beta-lactams/cephalosporins</b>           |                                      |                                     |
| Cephalothin – 1 <sup>st</sup> generation     | 2 - 16                               | ≤ 8                                 |
| Ceftiofur – 3 <sup>rd</sup> generation       | 0.5 - 4                              | ≤ 2                                 |
| <b>Macrolides</b>                            |                                      |                                     |
| Erythromycin                                 | 0.25 - 4                             | ≤ 0.5                               |
| <b>Lincosamides</b>                          |                                      |                                     |
| Pirlimycin                                   | 0.5 - 4                              | ≤ 2                                 |
| <b>Tetracyclines</b>                         |                                      |                                     |
| Tetracycline                                 | 1 - 8                                | ≤ 4                                 |
| <b>Sulfonamides</b>                          |                                      |                                     |
| Sulfadimethoxine                             | 32 - 256                             | ≤ 256                               |

**Table S3.** Sequence of primers, targeted genes, expected size of PCR products and their source.

| Gene        | Sequence (5'–3')                                                           | Size, bp | Source |
|-------------|----------------------------------------------------------------------------|----------|--------|
| <i>blaZ</i> | 1-AAG AGA TTT GCC TAT GCT TC<br>2-GCT TGA CCA CTT TTA TCA GC               | 517      | [19]   |
| <i>ermB</i> | 1-ACG ACG AAA CTG GCT AA<br>2-TGG TAT GGC GGG TAA                          | 409      |        |
| <i>ermC</i> | 1-CTT GTT GAT CAC GAT AAT TTC C<br>2-ATC TTT TAG CAA ACC CGT ATT C         | 190      |        |
| <i>tetK</i> | 1-TCG ATA GGA ACA GCA GTA<br>2-CAG CAG ATC CTA CTC CTT                     | 169      |        |
| <i>tetM</i> | 1-CCG CAC CCT CTA CTA CAA<br>2-CAT TCC ACT TCC CAA CG                      | 351      |        |
| <i>mecA</i> | 1-GTA GAA ATG ACT GAA CGT CCG ATA A<br>2-CCA ATT CCA CAT TGT TTC GGT CTA A | 310      | [28]   |

**Table S4.** Primary identification of bovine mastitis *Staphylococcus* spp. isolates.

| Tests    |         |            |      |       |           |          |           | Isolates<br>n/% |
|----------|---------|------------|------|-------|-----------|----------|-----------|-----------------|
| Catalase | Oxidase | Haemolysis |      |       | Pigment   | Mannitol | Coagulase |                 |
|          |         | Double     | Beta | Gamma |           |          |           |                 |
| +        | -       | +          |      |       | yellowish | +        | +         | 62/67.4         |
| +        | -       | +          |      |       | yellowish | +/-      | +         | 1/1.1           |
| +        | -       |            | +    |       | yellowish | +        | +         | 6/6.5           |
| +        | -       |            | +    |       | greyish   | +        | +         | 12/13.0         |
| +        | -       |            | +    |       | greyish   | +        | -         | 5/5.4           |
| +        | -       |            | +    |       | greyish   | +/-      | -         | 3/3.3           |
| +        | -       |            |      | +     | greyish   | +/-      | +         | 3/3.3           |

+/- = weakly positive reaction

**Table S5.** Distribution of isolates resistant in the Bauer-Kirby disk diffusion test by regions, districts and farms

| Region        | No farm   | N Districts    | N isolates | N resistant<br>isolates |
|---------------|-----------|----------------|------------|-------------------------|
| North central | 1         | Veliko Tarnovo | 8          | 2                       |
|               | 2         | Silistra       | 2          | 1                       |
| Northeast     | 3         | Targovishte    | 4          | 3                       |
| South central | 4         | Plovdiv        | 13         | 7                       |
|               | 5         | Kardzhali      | 5          | 0                       |
|               | 6         | Pazardzhik     | 2          | 0                       |
| Southeast     | 7         | Stara Zagora   | 5          | 3                       |
|               | 8         | Stara Zagora   | 3          | 2                       |
|               | 9         | Stara Zagora   | 4          | 0                       |
|               | 10        | Stara Zagora   | 13         | 7                       |
|               | 11        | Stara Zagora   | 12         | 5                       |
|               | 12        | Sliven         | 3          | 2                       |
|               | 13        | Sliven         | 14         | 0                       |
|               | 14        | Burgas         | 4          | 0                       |
| <b>Total</b>  | <b>14</b> | <b>9</b>       | <b>92</b>  | <b>32</b>               |

**Table S6.** Resistance patterns of bovine mastitis *S. aureus* isolates resistant in the Bauer-Kirby disk diffusion test by regions, districts and farms

| Antimicrobial resistance patterns | Region        | District       | No Farm | N isolates |
|-----------------------------------|---------------|----------------|---------|------------|
| S                                 | Southeastern  | Stara Zagora   | 10      | 1          |
|                                   |               |                | 11      | 2          |
| P (A)                             | North central | Veliko Tarnovo | 1       | 2          |
|                                   |               | Silistra       | 2       | 1          |
|                                   | Northeastern  | Targovishte    | 3       | 1          |
|                                   | South central | Plovdiv        | 4       | 1          |
|                                   | Southeastern  | Sliven         | 12      | 2          |
|                                   |               | Stara Zagora   | 7       | 3          |
|                                   |               |                | 8       | 2          |
|                                   |               |                | 10      | 5          |
|                                   |               |                | 11      | 1          |
| P (A)-E                           | South central | Plovdiv        | 4       | 1          |
|                                   | Southeastern  | Stara Zagora   | 11      | 2          |
| P (A)-T                           | Northeastern  | Targovishte    | 3       | 1          |
| P (A)-T-E                         | South central | Plovdiv        | 4       | 1          |
|                                   | Southeastern  | Stara Zagora   | 10      | 1          |
| P (A)-S-E                         | South central | Plovdiv        | 4       | 2          |
| P (A)-S-T-E                       | South central | Plovdiv        | 4       | 2          |
| P (A)-EFT-S-G-T                   | Northeastern  | Targovishte    | 3       | 1          |
| <b>Total</b>                      |               |                |         | <b>32</b>  |

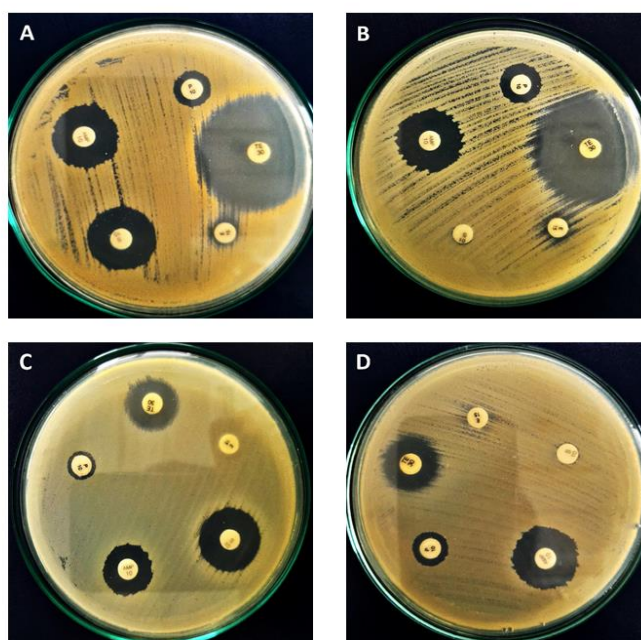

**Figure S1.** Some resistance patterns depicted by the disk diffusion test. A – resistance to penicillin, ampicillin and erythromycin; B – resistance to penicillin, ampicillin, streptomycin and erythromycin; C – resistance to penicillin, ampicillin, tetracycline and erythromycin; D – resistance to penicillin, ampicillin, streptomycin, tetracycline and erythromycin.

**Table S7.** Comparison between disk diffusion and MIC methods for testing resistance to penicillin.

|                                               | Minimum inhibitory concentration |                      | Total |
|-----------------------------------------------|----------------------------------|----------------------|-------|
|                                               | N sensitive isolates             | N resistant isolates |       |
| Disk diffusion method<br>N sensitive isolates | 63                               | 0                    | 63    |
| Disk diffusion test<br>N resistant isolates   | 1                                | 28                   | 29    |
| Total                                         | 64                               | 28                   | 92    |

**Table S8.** Comparison between disk diffusion and MIC methods for testing resistance to ampicillin.

|                                               | Minimum inhibitory concentration |                      | Total |
|-----------------------------------------------|----------------------------------|----------------------|-------|
|                                               | N sensitive isolates             | N resistant isolates |       |
| Disk diffusion method<br>N sensitive isolates | 62                               | 1                    | 63    |
| Disk diffusion test<br>N resistant isolates   | 0                                | 29                   | 29    |
| Total                                         | 62                               | 30                   | 92    |

**Table S9.** Comparison between disk diffusion and MIC methods for testing resistance to erythromycin.

|                                             | Minimum inhibitory concentration |                      | Total |
|---------------------------------------------|----------------------------------|----------------------|-------|
|                                             | N sensitive isolates             | N resistant isolates |       |
| Disk diffusion test<br>N sensitive isolates | 80                               | 3                    | 83    |
| Disk diffusion test<br>N resistant isolates | 0                                | 9                    | 9     |
| Total                                       | 80                               | 12                   | 92    |

**Table S10.** Comparison between disk diffusion and MIC methods for testing resistance to tetracycline.

|                                               | Minimum inhibitory concentration |                      | Total |
|-----------------------------------------------|----------------------------------|----------------------|-------|
|                                               | N sensitive isolates             | N resistant isolates |       |
| Disk diffusion method<br>N sensitive isolates | 86                               | 0                    | 86    |
| Disk diffusion test<br>N resistant isolates   | 0                                | 6                    | 6     |
| Total                                         | 86                               | 6                    | 92    |
